# Supplementary material
Source: MDPI journal article supplement (https://www.mdpi.com/2073-445X/6/4/77)
Supplement: s1 [file s1]

## Sheet: WaterRights_FullTable
Country_ISO	UN_Region	UN_SubRegion	Country	% labour force in agriculture - groups (based on CIA, undated)	>10% GDP from agriculture (1); <10% GDP from agriculture (2) (based on UN)	Income group (World Bank, 2017)	Developing (1) or Advanced (2) economy (IMF, 2016)	Agricultural lands as % of country area (World Bank, 2014)	Irrigated land as % of agricultural lands (World Bank, 2010-2014)	Irrigated lands as % of country area (calculation based on World Bank data)	Irrigated land as % of country area (based on CIA, 2017)	Legal Framework : only Indigenous Peoples (IP) or all communities	Landmark Indicator 1 score	Water score	Water scoring justification	water scoring legal evidence	water scoring additional information	Year of water law	Is all water owned by the nation, the state, or deemed an unownable public good?	Is state/public ownership result of all land & resources being owned by state/nation/public, not just for water?	Does the law explicitly distinguishes between public and privately owned waters?	Does the law state, &/or may it be safely inferred that water use for domestic & subsistence livelihood is free for communities/ip? [free= no permit or fee required]	Does the law state &/or may it safely inferred that customary & other community based norms for water allocation, management & use are lawful?
AFG	Asia	Southern Asia	Afghanistan	1	1	1	1	58.0676	5.74255	3.33456	5	all	3	2	Water belongs collectively to the people of Afghanistan. Government is responsible for its protection and management. Customary use and management of water is explicitly lawful.	Water Law of Afghanistan, 2009, Arts. 1, 2, 6-9, 19, 21. Constitution 2004, Art. 9.	Water use is free although service providers may charge fees. No permits required for drinking water, livelihood and other needs, use for navigation, or for extinguishing fires (Art. 19 of Water Law 2009). Customary norms for water distribution are sustained in law (Art. 6). "Water resources may be used according to the provisions of this law with due consideration for the praiseworthy customs an…	2009	YES	NO	NO	YES	YES
DZA	Africa	Northern Africa	Algeria	3	2	3	1	17.3953	2.76918	0.481706	1	all	3	3	Law guarantees water for domestic and agricultural needs and likely to be free (not clear in law). All water belongs to the state (national domain).	Loi no 05-12 du 28 Joumada Ethania 1426 correspondent au 4 aout 2005 relative a l'eau, Art. 2 & 3.	Cooperatives & other legal entities may apply for perpetual use rights (Certificates of Possession) to develop farms on rangelands (13.22% country) and alfa steppe (1.2%). On proof of development the Certificates of Possession may be converted into Certificate of Ownership (Art. 65). Since repeal of Pastoral Code in 1982 no provision for semi-nomadic and nomadic pastoralists but 95% by 2006 repor…	2005	YES	NO	NO	YES	NO
AGO	Africa	Middle Africa	Angola	1	1	3	1	47.4773			1	all	3	3	State owns all waters, bound to assure access & use to citizens & legal entities for rational needs and uses. However communities may lose rights to waterlands and waters due to land law.	Law No. 6 of 2002 on Water Use, Art. 5, 10 (2)	Provision is made for communities to secure farms and immediately adjacent areas under titles indicating "useful domain". This excludes all forests and remoter rangelands traditionally belonging to the community. These weaknesses may impact negatively on customary rights as affecting waters beyond their farmed lands.	2002	YES	YES	NO	ND	YES
ARG	Americas	South America	Argentina	4	2	3	1	54.3357			1	IP	3	3	While private owners own water on properties this is not yet definitively extended to indigenous peoples despite constitutional pledge & law enabling registration of communities.	Constitution of Argentina; Civil Code. Ley de Tierras Rurales 2011. Ley 25668 que Regula el Régimen de Gestión Ambiental de Aguas 2002.	The Constitution empowers Congress to guarantee respect for the community possession and ownership of lands [indigenous communities] traditionally occupy, but this is only a directive (not a right) (Sec. 75(1) Constitution, 1994). Ley de Tierras Rurales is silent on whether indigenous/community lands are protected by law. After ratifying the Convention 169, the Argentinian Government passed Law 2…	2002	NO	NO	YES	YES	YES
ARM	Asia	Western Asia	Armenia	3	1	2	1	59.0478	9.19641	5.43028	10	all	2	2	Waterlands are state property comprising <1% land area, governed on principle of devolution to 913 elected Community Councils.	Constitution 2005 Art. 9, 180. Land Code, 2001, Art.23& 26, Water Code, 2002, Art. 4	Strong community-based authority over water within community lands: 35% of national area is owned and regulated by communities including use and management of water. Government by elected Community Councils, headed by Community Mayors. Water use is free where there is no profit, for recreation, as rainfall on private lands, extinguishing fires, or needed to maintain ecological balance and sanitat…	2002	YES	NO	NO	YES	YES
AUS	Oceania	Australia and New Zealand	Australia	4	2	4	2	52.8838	0.577204	0.305247	0	IP	2	1	Native Title Act 1993 indicates that indigenous populations can file claims for native title to water resources, but does not specify the extent of indigenous water rights.	Art. 184, 211 Native Title Act 1993; Water Act 2007; Water Management Act 2000	Applications may include assertions that a person holds native title in relation to a "specified area of land or waters" (Art. 184, Native Title Act 1993). Australia's Water Act 2007 provides that "nothing in this [Water] Act affects the operation of the Native Title Act 1993." NOTE: Peer reviewed by Eliza Northrop, Associate, International Climate Initiative, WRI.	2007	NO	NO	NO	YES	YES
AUT	Europe	Western Europe	Austria	4	2	4	2	32.8902	1.91908	0.631191	2	all	2	1	Communities are acknowledged as landowners in respect of certain commons. The Federal Water Act, 1959 grants all citizens the right to use water for domestic purposes. Private property owners have a right to dispose water on their property for domestic purposes; this includes community landowners.	Constitution of Austria; Water Act, 1959; Property Valuation Act, 1955; Gesamte Rechtsvorschrift für Flurverfassungs-Grundsatzgesetz 1951, Fassung vom 29.06.2016	Private waters, such as springs, small rivers, and ground waters are privately owned by the owner of the property where it is located. Private owners have a right of disposal (for domestic and household economic needs) of the water on property. Surface water is mainly publicly owned; the Austrian Water Act defines all rivers and lakes within Austria as public waters. Government permission to use …	1959	NO	NO	YES	YES	YES
BLZ	Americas	Central America	Belize	4	1	3	1	7.01447			1	IP	4	3	The Water Industry Act, 2001 implies that the government owns all water resources in Belize. Use of water requires a license under the Water Industry Act (sec. 61). The Water and Sewage Authority is in charge of issuing licenses and administration of water use. In 2015 the Caribbean Court of Justice held that Mayan communities in Belize have rights to customary lands but ruling not applied.	Water Industry Act (No. 1 of 2001); Supreme Court of Belize (Claim No. 540 of 2006) National Fisherman Producers Co-Operative Society and Brown Surgar Market Place Limited. National Lands Act, 1992; Land Development Authority Act, 2000; Land Acquisition (Public Purposes) Act; Land Reform (Security of Tenure) Act, 1962; Forest Code (Law No. 420-Z).	The Supreme Court of Belize (Claim No. 540 of 2006) held that riparian owners have a right to ordinary and primary use of water located near their property. However, since Belize's national level laws do not recognize the ownership rights of communities, communities may not be entitled to the riparian rights protected by the Supreme Court. NOTE: In April 2015, the Caribbean Court of Justice ruled…	2001	YES	NO	YES	YES	YES
BEN	Africa	Western Africa	Benin	2	1	1	1	33.2565			1	all	2	2	Water Law No. 2010-44 makes water an integral part of the national public domain with exception of water from privately created sources so long as used for domestic purposes.	Law No. 2010-44 of 24 Nov 2010 concerning management of water in the Republic of Benin (Arts. 1 & 17, 19).	The right of all persons to water is stated (Art. 1) according to his needs for sustaining life and dignity (Art. 6). The state and local collective entities (les collecitvities territoriales) have respective duties to sustain water and ensure its equitable use (Art. 9) Customary practices in addition to local agreements which do not contradict law may govern water management (Art. 13).	2010	YES	YES	NO	YES	YES
BOL	Americas	South America	Bolivia	3	1	2	1	34.8052	0.71079	0.247392	1	all	1	1	Community rights and the sustainable management of water resources are recognized, respected and protected, including PIOC's, ICO's and PC's customary practices of managements.	Constitution of Bolivia (Art. 374); Ley de 26 octubre de 1906- Reglamento de aguas.	Article 374 of the Constitution provides "The State shall recognize, respect and protect the uses and customs of the community, of its local authorities and the rural native indigenous organizations over the right, management and administration of sustainable water." The Reglamento de aguas (1906) defines public waters as 1) waters that are born continuously or discontinuously in lands of the sam…	1906	NO	NO	YES	YES	YES
BWA	Africa	Southern Africa	Botswana	2	1	3	1	45.879	0.00961501	0.00441127	1	all	2	3	Water is appurtenant to land right, therefore owned for domestic purposes including watering stock. But communities not recognized as landowners unless legal entities. Free use of 'public water'	Water Act 1967, CAP 34:01, s.2, 4-16.	Communities have free access to public water which comprises, streams, rivers, lakes, pans, swamps & underground water not lawfully appropriated for use. As communities are not landowners, they do not have water rights as attached to community land. A small number of legal associations (Syndicates) and Group Ranches created for groups of interested individuals may create a right to sink a borehol…	1967	NO	NO	YES	YES	YES
BRA	Americas	South America	Brazil	4	2	3	1	33.81			1	IP	2	1	Indigenous peoples are entitled to the exclusive use of the rivers and lakes within their territory. Since the right is to exclusive use, but not ownership, a score of 2 is justified.	Constitution Article 231.2; Law 6,001 of 1973 (Indian Statute) 1, Art. 22, Art. 24, Water Code (Decree No. 24.643), 1975	Ownership of indigenous territories remains with the Federal government. Permanent possession and the exclusive right to usufruct natural resources is guaranteed. Legal transactions that restricts IP's rights over the land are prohibited (Law 6001, Art. 18). The land rights granted to indigenous people is that of permanent possession with the exclusive right to natural resources of the soil, rive…	1975	NO	NO	YES	YES	YES
BFA	Africa	Western Africa	Burkina Faso	1	1	1	1	44.2251			1	all	1	2	Water is a national resource belonging to society. Domestic use rights guaranteed. Pastoralists guaranteed water access. Local land charters allow communities to regulate ponds and local waters.	Law No. 002-2001/AN On the Water Management, Art. 2 & 5; Pastoral Code Law No. 034-2002/AN, ART. 28; Law 034-2009/AN, Art. 6, 7, 13.	All country belongs to the nation in common; Constitution, 1991 (2012) Art. 14 Law 034-2009/AN, on Rural Land Tenure, Art. 2) Rights to land by state, local governments (communes, municipalities) and private holding (customary or statutory) put on equal footing. Distinction is by formalization whether a customary right or not. Law 034-2009/AN and Law -34-2012/AN provides procedure for registratio…	2001	YES	YES	NO	YES	YES
BGR	Europe	Eastern Europe	Bulgaria	4	1	3	1	45.8456	1.97598	0.905898	1	all	4	3	Federal Water Act, 1999 recognizes the right of all citizens to use water for domestic purposes, and protects private ownership of water located within the boundaries of landowner. No recognition of communities as landowners therefore they do not own water on this basis, but as citizens may freely use for domestic purposes.	Constitution of Bulgaria; Water Act, 1999 (amended 2011)	Article 3 of the Water Act provides that "freshwaters within the territory of the Republic of Bulgaria shall be national strategic resources." Article 7 provides protection of private ownership rights to water "insofar as the exercise of such right does not interfere with the integrity and unity of the hydrological cycle and of the natural aquatic system." Article 8 recognizes a right to common w…	1999	YES	NO	NO	YES	NO
KHM	Asia	South-Eastern Asia	Cambodia	3	1	2	1	30.903			2	all	2	2	The Law on Water Resources Management provides that all water resources in Cambodia are owned by the state (art. 3). The law grants landowners use rights to water for drinking, washing, bathing, and other domestic purposes (art. 11). The law also provides landowners and occupiers rights to collect and use rainwater and water flowing through their properties. Indigenous community landowners can ex…	Constitution of Cambodia; Law on Water Resources Management of the Kingdom of Cambodia, 2007	Ownership of indigenous community lands are granted by the State to indigenous communities as collective ownership. Collective ownership right limited to cultivated/shifting cultiv. lands, burial land, spiritual forest land. WATER: Article 27 of the Law on Water Resources Management provides "The owner or occupier of upstream land is entitled to collect and use rain-water and the water flowing ov…	2007	YES	NO	NO	YES	YES
CMR	Africa	Middle Africa	Cameroon	2	1	2	1	20.6258			1	all	3	3	Law of 1998 makes water a common national resource protected and managed by the State which shall facilitate access by all citizens (Section 1).	Law No. 98-5 of 14 April 1998 governing water resources. Law No. 2004-18 setting out the rules applicable to communes. Decree No. 2010/0239/PM transferring competencies for construction and management of wells and boreholds to communes.	Management may be transferred to local regional and district councils or leased (s. 2) but no legal provision for this to include directly to communities. not directly to communities. Land around water catchments, treatment and storage points is protected public property (s. 7). However, traditional authorities may settle water use disputes on the basis of customary practices (s. 24 (1)).	1998	YES	NO	NO	YES	YES
CAN	Americas	Northern America	Canada	4	2	4	2	7.17611			1	IP	2	3	The Federal Water Act, 1985 only creates Canada's water governance structure. Water rights are governed at the provincial level, and most provinces require permits or licenses to use water. IP communities have weak to ambivalent water ownership but guaranteed safe drinking water	Safe Drinking Water for First Nations Act, 2013; Water Act 1985; Indian Act 1985	Section 3 of the Safe Drinking Water for First Nations Act, 2013 provides "For greater certainty, nothing in this Act or the regulations is to be construed so as to abrogate or derogate from any existing Aboriginal or treaty rights of the Aboriginal peoples of Canada under section 35 of the Constitution Act, 1982, except to the extent necessary to ensure the safety of drinking water on First Nati…	2013	YES	NO	NO	YES	ND
TCD	Africa	Middle Africa	Chad	1	1	1	1	39.6561			1	all	4	3	All land and water is state property with free use by lawful occupants and private owners assured for non-commercial use.	Loi No. 016/PR/99 Portant Code de l'Eau, Art. 1 & 5.	Water Law of Chad, Loi 016/PR/99 of 2 juillet 1999; 'All resources within the boundaries of the national territory are a public good, inalienable and imprescriptible' (Art. 1). Existing rights of occupation on public domain includes water use rights in accordance with the area occupied, but does not imply ownership (Art. 5). Collection and use of rainwater on property is free (Art. 6). Water from…	1999	YES	YES	NO	YES	YES
CHL	Americas	South America	Chile	4	1	4	1	21.1977			2	all	2	2	Law No. 5 of on Agricultural Communities 1968 (Amended 1993) establishes rights to use water located on lands held by agricultural communities. However, the law suggests that these rights can only be used for agricultural purposes.	Constitution of Chile. Ley 1993 no. 19.233, Modifica Decreto con Fuerza de Ley No. 5, de 1968, del Ministerio de Agricultura, que contiene la normativa legal sobre las Comunidades Agrícolas.	Until 1981, water was a public good under the Civil Code. The new Water Code, 1981 recognized and protected water rights as property rights assigned definitively and in perpetuity. The Law No. 5 on Agricultural Communities 1968 (amended 1993) provides communities with rights to own, use and enjoy lands held in common. However, the law establishes limitations on these ownership rights and it is un…	1981	NO	NO	NO	YES	ND
CHN	Asia	Eastern Asia	China	3	2	3	1	54.8084			8	all	1	2	The Chinese government owns all water resources. Collectives are granted use rights to local waters. The Ministry of Water Resources is charged with allocating water entitlements on an annual basis.	Art. 3, 2002 Water Law	Art. 3 of China's 2002 Water Law provides that "water resources are owned by the State. The State Council, on behalf of the State, exercises the right of ownership of water resources. The water of ponds belonging to rural economic collectives and the water of reservoirs built and managed by such collectives shall be used by the collectives respectively." Therefore while communities endure periodi…	2002	YES	YES	NO	ND	YES
COL	Americas	South America	Colombia	4	2	3	1	40.4808	1.45173	0.58767	1	all	1	2	Water resources belong to the State. However, communities can utilize water resources for their own traditional purposes and for subsistence.	Constitution, Art. 83; Law 70, Art. 6, Art. 19; Decree 2164, Art 24; Constitutional Court, Case T-380 of 1993, Case T-955 of 2003	Judiciary interpretation states that property rights recognized to communities include the right to use water resources according to customary rules.	2003	YES	ND	NO	YES	YES
CRI	Americas	Central America	Costa Rica	4	1	3	1	35.47			2	IP	1	1	Law No. 6172 provides that indigenous communities are the owners of land held within their territories (Art. 2), and Article 4 of the Water Act No. 276 (1942) provides that landowners own water located within their property.	Ley Nº 276 - Ley de Aguas, 1942; Constitution of Costa Rica; Indigenous Law No. 6172 of 1977; Regulation of the Indigenous Law No. 8487; Law No. 7316, 12 October 1992 and; ILO 169, 1989Regulation of the Indigenous Law No. 8487	Distinction between public and private waters. Article 4 of the Water Act (Ley No. 276 of 1942) provides ownership rights to rainwater. It also states that groundwater belongs to communal or private landowners. It defines public water as water located in lagoons, estuaries, inland lakes, rivers, inter-country streams , underground water that is not well water, and rainwater that flows through rav…	1992	NO	NO	YES	YES	YES
CIV	Africa	Western Africa	Côte d'Ivoire	2	1	2	1	64.7799			1	all	3	3	Water is the common property of the nation with use rights for all, including the right of communities to define waters for sacred uses, and rights of individuals and communities to regulate water on their properties, but limitations on recognition of community lands reduce score.	Water Code, No. 98-755 of December 1998. Law of Public Domain 1928.	Community/ customary lands recognized as existing but denied status as property until certificated and then Certificates converted into property titles. Opportunity to do so only till 2019 at which point the customary domain ceases to exist. Virtually no uptake of certification or conversionary titling due to costly procedures and refusal to use law to certify rights perceived as already existing…	1998	YES	NO	NO	YES	YES
CUB	Americas	Caribbean	Cuba	4	1	3	1	60.3625			8	all	3	2	Article 20 of the Constitution provides "the agricultural-livestock production cooperatives administer, possess, use, and dispose of the assets of their property, in accordance with that established in the law and its regulations." Decreto Ley No. 138, 1993 establishes rights to use groundwater based on allocation plans established by the government (Art. 4).	Decreto Ley Nº 138 - Ley de las aguas terrestres, 1993; Constitution of Cuba; Agrarian Reform Law, 1959; Decree Law No. 125 - System of possession, ownership and inheritance of land and agricultural goods; Civil Code, 1987; Decree Law No. 300 - Delivery of idle state lands in usufruct.	Decree No. 125 establishes that agricultural cooperatives are granted land rights for purposes of conducting agricultural production activities. Article 3 states "Article 3. The state-owned land will be interchangeable with cooperatives and small farmers, when the purpose is to achieve a rational physical integration. In addition, the state-owned land may be delivered in usufruct." "Decree No. 12…	1993	YES	YES	NO	YES	YES
COD	Africa	Middle Africa	DRC		1	1	1	11.5569			1	all	3	3	Contradictions between Constitution & Land Law on customary rights including water rights. Constitution recognizes customary law & collective rights but land law requires registration to be upheld & no provision for this to occur.	Constitution, 2006, Arts. 9, 34, 203, 204, 207. General Property Law, No. 21 of 1973 (1980) Arts. 53-56, 387-389, 219. Law on Water, No. 15/026 of 2015, Arts. 4,5,13, 84.	Constitution does not establish state ownership over waters only state sovereignty (jurisdiction) (Art. 9) echoed by Water Law, 201 (Art. 4). Constitution also recognizes collective property, admits customary law, recognizes customary authority (Arts.34, 203, 204, 207). HOWEVER, this is contradicted by General Property Law, 1973 (amended 1980) which makes land and resources including water the pr…	2015	NO	NO	NO	YES	YES
TLS	Asia	South-Eastern Asia	East Timor	2	1	2	1	25.5548			3	all	1	3	The law creates the category of 'community water', but gives no definition. The law leaves the regulation of community water to customary practices. Constitutional provisions potentially contradict status as community water.	Constitution, 2002. Art. 1305 of the Civil Code (2011).	The Constitution establishes that all natural resources vital to the economy are property of the state (Art. 139.1). This vague provision is at times used by state officials to claim ownership of natural resources, such as water. The Civil Code divides water into three categories: (1) Public, (2) community, (3) private. Only private water is further regulated by the Civil Code, the types of water…	2011	YES	NO	YES	YES	YES
ECU	Americas	South America	Ecuador	3	1	3	1	22.5548	16.7806	3.78483	1	IP	1	3	The Water Resources Act 2014 reportedly limits the water rights of indigenous communities by privatizing these rights (reviewer could not find a copy of this legislation online).	Art. 57, Constitution, 2008; Ley Nº 54 - Ley de Desarrollo Agrario; Presidential Decree 1247 (2012); Law No. 46-2006 the Collective Rights Act of Black People or Afroecuadoreans	Article 57 of the 2008 Constitution states "indigenous communes, communities and nations are recognized and guaranteed...to keep ownership, without subject to a statute of limitations, of their community lands, which shall be unalienable, immune from seizure and indivisible...to keep ownership of ancestral lands and territories and obtain free awarding of these lands...." Article 60 of the Consti…	2014	NO	NO	YES	ND	ND
EGY	Africa	Northern Africa	Egypt	3	1	2	1	3.76212			4	all	3	3	Water belongs to the people in common and rights to use it are generally aligned to land rights. All are guaranteed sufficient water to live and "to enjoy the River Nile" (Constitution, 2014, Art. 45).	Constitution, 2014 Art. 3 & 45 Law No. 12 of 1984 on Irrigation and Drainage provides most guidance on use rights (no translation of Arabic found).	Laws focus on distribution of water and regulation of its use including irrigation. Law No 12 of 1984 provides the institutional framework and rules, several times amended, such as in a 2012 Regulation as to where rice may be cultivated and arrangements for water use. Law rests on a distinction between public water in the form of public waterways and sources and private rights to create and use w…	1984	YES	YES	YES	YES	ND
ERI	Africa	Eastern Africa	Eritrea	1	1	1	1	75.1683			1	all	4	3	Constitution declares all land, water and natural resources below and above surface belong to the state, citizens have lifetime usufructs to their land and free rights to water for non-commercial use.	Constitution, 1997, Art. 23, Eritrea Water Proclamation, No. 162 of 2010, Land Proclamation, 1994.	Water Proclamation 2010 is focused on regulation of non-subsistence water use especially in urban areas. Rural use for domestic and subsistence agro-pastoral use is regulated at local level. While customary rights are abolished this is less meaningful given strongly devolved governance to local levels. On the other hand the 1994 land law does not provide for collective tenure, other than for arab…	2010	YES	YES	NO	YES	NO
ETH	Africa	Eastern Africa	Ethiopia	1	1	1	1	36.259			1	all	3	2	Water belongs to Ethiopians in common and domestic use (free) takes priority. Permits required for non-traditional or commercial uses.	Constitution 1995. Ethiopian Water Resources Management Proclamation No. 197/2000. Council of Ministers Ethiopian Water Resource Management Regulations No. 115/2005.	All natural resources including water belong to the State and people of Ethiopia (Constitution 1995 Art. 40.3). Reiterated in No. 197/2000 Art. 5. Domestic uses made the priority (Art. 7.1). Permits not required for digging or use hand-dug wells, traditional irrigation, artisanal mining, traditional animal rearing or water mills (Art. 12.1). Permits for commercial or other uses governed by No. 11…	2000	YES	YES	NO	YES	YES
FIN	Europe	Northern Europe	Finland	4	1	4	2	7.46027	0.420633	0.0313803	1	all	2	2	Standing and stored water (tanks) may be owned privately in Finland (Water Act, 2011). Water projects must not undermine Sami rights to practice their cultures & livelihoods.	Constitution of Finland; Water Act No 587/2011. Act on Metsähallitus 2016	The Water Act, No. 587 of 2011 refers to ownership of non-flowing water as attached to property, and rights of landowners to share equally the water of a river or brook passing through their land (Cht 1, section 1). Sami rights are specifically protected in that "A water management project located in the Sami homeland or that has impacts on this shall be implemented in a manner that does not unde…	2011	NO	NO	YES	YES	YES
GAB	Africa	Middle Africa	Gabon	2	1	3	1	20.0256			1	all	4	3	Water is State Property but communities may freely access for domestic use in accordance with customary norms. Scored 3 rather than 2 due to limitations in recognition of community property.	Law No. 14 of 1963 on State Property.	Water is owned by the State: Art. 109 of Law No. 14 of 1963 on State Property stipulates that 'All standing or flowing water, all navigable rivers, floatable or not, natural or artificial, shall be the Public Property of the State'. The Forest Code, 2001 Article 252. permits free water use for individual or collective needs by village communities. Commercial use is only through permits under same…	1963	YES	NO	NO	YES	YES
GMB	Africa	Western Africa	Gambia	1	1	1	1	59.7826			1	all	2	1	Water is defined as 'land' and land may be owned by the state, by individuals or by district authorities (chiefs) in trust for communities in accordance with customary law. Use of all water irrespective of owners is regulated.	State Lands Act, Cap. 57:02, s. 2. National Water Resources Council Act, No. 22 of 1999, Cap 66:02.	Land means any land in The Gambia and includes lagoons, creeks, rivers, estuaries whatsoever within the territory of The Gambia' (s. 2 State Land Act Cap 57:02). Water use is regulated by a National Water Resources Council and administered by the Department of Water Resources in consultation with local governments and traditional authorities (Act. No. 22 of 1999 Cap 66:02 s.7 & 13).	1999	NO	NO	YES	ND	YES
DEU	Europe	Western Europe	Germany	4	2	4	2	47.9364	2.18961	1.04962	2	all	2	1	Article 4 of the Water resources Act, 2009 provides landowners with ownership rights to non-flowing surface water and groundwater located on their property. This covers community land owners.	Water Resources Act, 2009; German Constitution (Basic Law); Federal Forest Act 1975; Act on improvement of agricultural structure and coast protection, 1969; Land Consolidation Act, 1953; Land Parcel Act 1961	Article 4 of the Water Resources Act provides § 4 Ownership of water (bodies), limitations to the ownership of land (1) The ownership of Federal Waterways vests in the Federal Republic in accordance with water law provisions. As the owner of federal waterways, the Federal Republic has to meet all obligations arising from statute, regulations based upon statutes and other water law provisions. (2)…	2009	NO	NO	YES	ND	ND
GHA	Africa	Western Africa	Ghana	3	1	2	1	68.9989	0.229299	0.158214	1	all	1	2	Ownership and management of all waters is vested in President on behalf of citizens. Customary norms of non-commercial water use apply in customary lands subject to policies.	Constitution 1993 Art. 21.6, 11.1, Water Resources Commission Act, 1996 (Act No. 522) s 1,.12, 14.1.	Constitution 1993 vests 'rivers, streams, water courses throughout Ghana ... is the property of the Republic of Ghana and shall be vested in the President on behalf of, and in trust for the people of Ghana’ (Art.21.6). Reiterated in Water Resources Commission Act, 1996 as s. 12. Commission regulates use and coordinated policies related to uses. Domestic use protected: 'A person who has lawful acc…	1996	YES	NO	NO	YES	YES
GEO	Asia	Western Asia	Georgia	2	1	3	1	36.8024			7	all	4	4	Water resources, and lands directly adjacent to rivers, as well as territorial waters, are state property. Management powers have moved from villages to higher levels.	Law on State Property, 2010. Law of Georgia on Water, as substantially amended in March 2013, Art. 6. Local Self-Government Code, 2014.	Control over pastures, forests and water have all been removed from village authority in recent years. Village councils (Gamgebeli) are now unelected implementation unitls for 69 municipalities; the latter do have autority over water (Local Self-Govenrment Code, 2014, Art. 16 (2)(c)). The State may however transfer water property from the State Water Fund to a municipality (Art. 107 (2)). Citizen…	2013	YES	NO	NO	NO	ND
GUY	Americas	South America	Guyana		1	3	1	8.53442			1	IP	2	1	Amerindian water rights can be implied from the State Lands Act. Amerindian Communities are granted traditional water entitlements, which are defined as use rights that are recognized by custom. All communities, as citizens, can obtain use rights as citizens.	Water and Sewage Act 2002; Constitution of Guyana 2012; Amerindian Act of 2006; State Land Act of 1910 (1997); Guyanese Constitution of 1980 (2001).	The State Lands Act assumes that the State is the owner of all water resources, but includes a provision stating "nothing in this Act shall be construed to prejudice, alter or affect any right or privilege legally possessed, exercised or enjoyed by any Amerindian in Guyana." Furthermore, section 18(2) provides that all existing rights to own, use, abstract, manage and control the flow of water ar…	2002	YES	ND	NO	YES	YES
HND	Americas	Central America	Honduras	3	1	2	1	28.9123			1	IP	1	2	Under the General Water Law (2009), rights to both surface and groundwater vest in the state, but provides a right for all citizens to use water for domestic purposes. Under the Water Framework Law of 2003, municipalities have preference over all other users for the purpose of providing water for human consumption or discharge of sewage. IP & Afro-Hondurans have rights to use water for domestic p…	General Water Law (2009); Water and Sanitation Law 2003; Constitution of Honduras	Law relates to IP and Afro-Hondurans, not just to IP. Article 346 of the Constitution of Honduras provides "It is the duty of the State to adopt measures to protect the rights and interests of the indigenous communities in the country, especially of the lands and forests in which they are settled". Article 93 of Property Law 2004 provides that "the State, for the special importance for the cultur…	2009	YES	ND	NO	YES	YES
IND	Asia	Southern Asia	India	3	1	2	1	60.4065	36.8032	22.2315	1	all	2	3	The Supreme Court of India has interpreted the right to water as included as part of the right to life (Art. 21 of the Constitution). Therefore, all citizens, including communities, of India have a recognized human right to access and use drinking water (though State retains ownership). Since community ownership is limited to forest lands, it can be implied that community rights to water are also…	Inter-State River Water Disputes Act, 1956; Tekaba AO v. Sakumeren AO (2004) 5 SCC 672; Wasim Ahmed Khan v. Govt. of AP, 2002 (5) ALT 526 (D.B.) Schedule 7, Constitution of India; Art. 262, Constitution of India	The Supreme Court of India held that state is the sovreign dominant owner of water (Tekaba AO v. Sakumeren AO (2004) 5 SCC 672). However, the Supreme Court also held that the right to life includes the right to safe and sufficient water (Wasim Ahmed Khan v. Govt. of AP, 2002 (5) ALT 526 (D.B.)) India's states have exclusive power to regulate water supplies, irrigation canals, water storage, etc.,…	1956	YES	NO	NO	YES	ND
IDN	Asia	South-Eastern Asia	Indonesia	3	1	2	1	31.4644			4	all	2	2	The Water Law 7/2004 recognizes traditional communal rights on water resources so long as they actually exist and have been confirmed with local regional regulations.	Art. 16(2), Basic Agrarian Law; Water Law 7/2004; Constitution of Indonesia	Article 16(2) of the Basic Agrarian Law provides that "the rights on water... include the right of using water... the right of breeding and catching fish."Article 33(3) of the Indonesian Constitution provides that "the land, the waters and the natural resources within shall be under the powers of the State and shall be used to the greatest benefit of the people." Articles 6 of the Water Law 7/200…	2004	NO	NO	NO	YES	YES
IRQ	Asia	Western Asia	Iraq	4	1	3	1	21.3414			9	all	3	3	The Agrarian Reform Law No. 117 suggests that collective farms have a right to use water located on their properties for agricultural purposes. No provision for pastoral communities.	Agrarian Reform Law No. 117 of 1970; Ministry of Water Resources Law No. 50 of 2008	Article 1 of the ARL provides for the collective distribution of agricultural units. Article 16 provides that "agrarian reform lands shall be distributed to peasants collectively or individually in accordance with conditions provided in the area when such distribution takes place and within the limits specified".' NOTE: Reviewer could not translate the MInistry of Water Resources Law No. 50 of 20…	2008	YES	ND	ND	ND	ND
ISR	Asia	Western Asia	Israel	4	1	4	2	24.8475			11	all	4	4	The Israeli Water Law Act states that all the water resources in Israel are public property, and there is no private or communal ownership in water resources.	Israeli Water Law 1959	Traditionally, Israel has suffered from severe water shortages. Advances in water conservation and desalination technology, however, have made Israel a net-water producer. This has strengthened Israel’s ability to meet its legal, which states that all Israelis have a right to water access. The amount and quality of that water is left to Israeli government to decide.	1959	YES	NO	NO	ND	NO
ITA	Europe	Southern Europe	Italy	4	2	4	2	44.7474	19.0829	8.5391	14	all	4	3	Act No. 36 on Water Resources, 1994 recognizes that all citizens of Italy have a right to use water for drinking and human consumption. However, since community land rights are only recognized at the state-level in Trentino, it is unclear whether collective property rights to water are recognized in other parts of Italy.	Act No. 36 on Water Resources, 1994 (Galli); Decree-Law No. 2008; Constitution of Italy; Act No. 991 on mountain areas; Provincial Act No. 9 2007 laying down provisions on land; Provincial Act No. 6 2005 on management of public lands, (Trention-Alto Adige state-level law).	Act No. 36 on Water Resources, 1994 (Galli); Decree-Law No. 2008 on urgent measures concerning water resources and environmental protection; Constitution of Italy; Act No. 991 on mountain areas; : Provincial Act No. 9 laying down provisions on land reclamation and preservation of farms, and amending certain provincial acts on agriculture, 2007 (Trentino-Alto Adige state-level law); Provincial Act…	1994	NO	NO	ND	ND	ND
JOR	Asia	Western Asia	Jordan	4	1	3	1	11.9847	9.86842	1.1827	2	all	4	4	The Water Authority Law establishes Jordan's water governance structure; however, it does not establish that citizens have rights to own or use water. The Constitution and other laws do not establish that citizens or communities have a right to water.	Law No. 18 of 1998 (Water Authority Law)(amended 2014); Constitution of Jordan; Law No. 17 of 1974 on the management of public land; Rangeland Law, 1971.	Under the 1971 Rangeland Land Law, the government claims all uncultivated land as belonging to the State. All land receiving less than 200mm rain per year, unless privately owned, is designated for communal pastoral use. The 2002 provisional agricultural law establishes that rangelands are lands registered in the name of the Kingdom's treasury or any other State lands in which the annual rainfall…	1998	YES	NO	NO	NO	NO
KAZ	Asia	Central Asia	Kazakhstan	3	1	3	1	80.3763			1	all	4	4	Article 4 Water Code provides that the state owns all water in Kazakhstan. Citizens are permitted the right to use water under Article 22. As communities do not have recognized rights to land in Kazakhstan, communal rights to water may be limited and subject to government discretion.	Water Code, 2003; Art. 26, Constitution of the Republic of Kazakhstan; Land Code of the Republic of Kazakhstan, 2003; Law on State-Owned Property, 2011	Article 4 of the Water Code provides that waters in the Republic of Kazakhstan are the exclusive property of State. However, all citizens are granted the right to use water under Article 22 of the Water Code. Article 22 states "the right to use water bodies 1. The right to use water bodies is available to individuals and legal entities by local executive bodies in coordination with the authorized…	2003	YES	YES	NO	ND	NO
KEN	Africa	Eastern Africa	Kenya	1	1	2	1	48.5469			1	all	1	2	All waters are owned by the nation collectively, vested in the state. Only domestic use, spring or storage on property is not subject to permit. Communities have same use rights as private owners.	Water Act,No. 43 of 2016.	Water Act, 2002 vested water in the State. Rights to control every water, and rights to use water from any water resource vested in the Minister (s. 4 & 5). Water Act 2016 modifies this in line with Constitution to state that "Every water source is vested in and held by the national government in trust for the people of Kenya" (s. 5) and renames the National Water Management Authority as Water Re…	2016	YES	NO	NO	YES	YES
KGZ	Asia	Central Asia	Kyrgyzstan	3	1	2	1	55.0422	9.50166	5.22993	6	all	3	2	The law does not recognize communities or indigenous peoples as owners of water but does grant Pasture User Unions the right to use water for agricultural/pasture purposes. Article 4 of the Water Code, 2005 provides that all citizens have a right to use water. Presumably, Pasture User Unions, as citizens of Kyrgyzstan, are granted the right to use water.	Water Code, 2005; Constitution of the Kyrgyz Republic; Kyrgyz Republic. Law on Pastures, No. 30, 2009	Article 4 of the Water Code "1. The water resources of the Kyrgyz Republic are the exclusive and inalienable property of the State. Every person has the right to use water within the national borders in accordance with the provisions of this Code. 2. The lands occupied by water bodies and state owned water economy constructions and irrigation systems are the exclusive property of the State." Arti…	2005	YES	YES	NO	YES	ND
LAO	Asia	South-Eastern Asia	Laos	2	1	2	1	10.2643	11.5238	1.18284	2	all	3	2	Water belongs to people of Laos, Government manages and allocates water use rights. Use and protection rights to wetland areas may be allocated to individuals or organizations. Law provides individual use rights to water, which may be exercised by all citizens (thus, as citizens of Laos, communities are also granted a use right). Community use of water for domestic purposes is free and does not r…	Water and Water Resources Law, 1996; Land Law 2003; Constitution of Laos, 1991	The Land Law 2003 and implementing decrees recognize use rights to collectively and customarily held land." Use and protection rights to wetland areas may be granted to individuals or organizations through an application for a land use certificate by the administrative authority of the village to the district administrative authority. Article 4 of the Water and Water Resourcse Law provides that "…	1996	YES	YES	NO	YES	YES
LSO	Africa	Southern Africa	Lesotho	1	1	2	1	75.0099	0.0532836	0.039968	1	all	2	2	Water belongs to the Basotho Nation in common. Domestic use governed by customary law and community councils supervise water points. Non-domestic use governed by Water Resources Act, 2008.	Water Resources Act, No. 15 of 2008, 4, 5 & 6.	Land belongs to the nation in common, with right to allocate vested in the King as trustee for the nation (Constitution 1993, Art. 107-09); by statute Land Act, 2010 vests this right in elected community councils which include two appointed chiefs (s. 14 (1), and Amendment to Local Government Act, 1997 (2004, s. 4). Customary norms apply (including written Laws of Lerotholi (1903, modified substa…	2008	YES	YES	NO	YES	YES
LBR	Africa	Western Africa	Liberia	2	1	1	1	28.0316			1	all	3	2	Water may be private or community property (e.g. in forestlands) with its use closely regulated by statute. But weak provision for community property, to change if Land Rights Law is approved in 2017.	Constitution 1986 Art.22.b. Property Law Title 29 Chapter 8.3. An Act to Amend the Public Authorities Law to Create the Liberia Water and Sewer Corporation, 1973. Environment Protection and Management Law, 2003. . Community Rights Law with respect to Forest Lands, 2009.	Constitution 1986 omits water as the property of the Republic (Art. 22.b). Property Law Cht. 8.3 defines land as including water. The Liberia Water and Sewer Corporation, 1973 regulates and administers all water matters, now guided by the National Integrated Water Resources Management Policy, 2007. Enactment of a comprehensive Water Law intended but not yet delivered. The Environmental Protection…	1973	NO	NO	YES	YES	YES
LBY	Africa	Northern Africa	Libya	4	1	3	1	8.72387			1	all	4	4	Water is public common property and may be freely used for domestic needs and stock watering. In practice communal wells are possessed by tribes but without legal recognition.	Law No. 3/1982 on the Regulation of the Exploitation of Water Sources.	Law No. 3/1982 on the Regulation of the Exploitation of Water Sources: Article 1: “Water is shared by all people …”. Article 2: “Sources of water in Libya are owned by the people and in terms of this law water sources mean all natural water sources whether on or beneath the surface. Article 5: “A. Every person can drink and water his animals from oases, valleys and streams, provided that that cau…	1982	YES	YES	NO	YES	YES
MKD	Europe	Southern Europe	Macedonia	4	1	3	1	50.0793			0	all	4	4	The statutory and regulatory framework does not explicitly recognize community land or water rights in Macedonia.	Law on Inland Waterways, 2007 (Amended 2015); Constitution of Macedonia, 1991; Law on Ownership and Other Real Rights, 1996; Law on privatization of state agricultural land, 2013; Law on Pastures, 2000.	Article 30 of the Constitution provides "The right to property and the right to inheritance are guaranteed. Ownership of property creates rights and duties and should serve the wellbeing of both the individual and the community. None may be deprived or limited of his/her property, or of the rights deriving from it, except in the public interest determined by law. If property is expropriated or re…	2007	YES	NO	YES	ND	NO
MWI	Africa	Eastern Africa	Malawi	1	1	1	1	61.4128			1	all	3	3	Although attached to the land, water is vested in President, control vested in Minister. Domestic rights to use public water assured. No provision for communities.	Water Resources Act, No. 15 of 1969 (CAP: 72:03), Ss. 2, 3, 6 (1) & 7.	Domestic purposes includes watering of stock. Public water means ground and underground water but excludes stagnant pan or swamp wholly contained within private land (Water Resources Act, 1969, s. 2). No prescriptive rights to water permitted (s. 7).	1969	YES	NO	YES	YES	ND
MYS	Asia	South-Eastern Asia	Malaysia	4	1	3	1	23.8594			2	all	3	3	Federal Water laws of 1920 and 2006 do not establish that individuals have a right to use water for domestic purposes. The Act only provides that ownership and control of rivers in each State are vested solely in the Ruler (Sec. 3).	Sec. 3, Waters Act 1920- amended 1989; Water Services Industry Act, 2006	Water ownership and management is devolved to States. The law establishes that "Subject to the terms of any express grant made by or on behalf of the Ruler of a State, the entire property in and control of all rivers in any State is and shall be vested solely in the Ruler of such State; provided that in the case of lands held by the Government under grant or lease or reserved for a public purpose…	1920	YES	NO	NO	ND	ND
MRT	Africa	Western Africa	Mauritania	2	1	2	1	38.5282			1	all	3	2	Water belongs to the State and is inalienable and imprescriptible. Collective use rights are recognized, well provided for pastoral groups but no provision for collective entitlement.	Water Code as Ordinance No. 85-144 of 4 July 1986. Order 83.127 of June 1983 nationalizing land and abolishing customary tenure (Art. 3). Pastoral Code, Act. 444 of 2000.	Water is a national resource (Water Code of 1986 Art. 3). Land Code of 1983 Code converted property rights including water into use rights (Ordinance No. 85-144, Art. 10). Socio-economic needs of the population take precedence in allocation of water (1986, Art. 105), followed by needs related to cattle rearing, agriculture, silvicuture, fishing and reafforestation projects, and finally for indust…	1986	YES	YES	NO	YES	YES
MEX	Americas	Central America	Mexico	4	2	3	1	54.8908	5.50021	3.01911	1	all	2	2	Ownership of water is vested in the State. The Agrarian Law grants ejidos/comunidades rights to use water located on or near their land.	Art. 55, Agrarian Law critically amended in 1994 & 2012); Ley de Aguas Nacionales, 1992 Arts. 16, 20.	The law provides that the water falling within ejido lands, which are in common use, rules will be provided for in the rules of procedure of the ejido as long as laws and regulations are not violated and includes allocations to individuals (Art. 55, Agrarian Law). All legal articles in the Agrarian Law that apply to ejidos also apply to comunidades (Agrarian Communities) unless there is a specifi…	1992	YES	ND	NO	YES	YES
MNG	Asia	Eastern Asia	Mongolia	3	1	2	1	72.6953			1	all	3	2	Pastures are owned by State but allocated to communities including right to free water for domestic and stock watering needs.	Art. 3, 8, The Mongolian Law on Water and Mineral Water Use Fees (1995)	The Constitution provides that "the State may give for private ownership plots of land, except pastures and areas under public utilization and special use." Article 5 of the 2002 Law on Land states "the land other than that for pasture and common use...shall be owned only by citizens of Mongolia." Art. 54 of the 2002 Law on Land provides that "summer and autumn settlements and rangelands shall be…	1995	YES	ND	NO	YES	YES
MOZ	Africa	Eastern Africa	Mozambique	1	1	1	1	63.5189			1	all	1	2	Water belongs to the State. Distinction drawn between common and private use. Common use includes domestic & personal use including stock watering and small scale irrigation. Not subject to permits or fees, conducted locally in accordance with traditional norms.	Constitution 2008. Water Law, No. 16 of 1991. Regulations on Water Licences and Concessions, Decree No. 43 of 2007.	Water Law of 1991 stipulates that all water constitutes the public water domain (Art. 1) Divides water into common and private use, the latter subject to licences (Art.21.1). Common use means water is obrained without mechanised means, meets domestic, personal and family need, including livestock watering and smallscale irrigation (Art. 21.2). Common water use is free, not subject to permits, and…	1991	YES	YES	YES	YES	YES
NAM	Africa	Southern Africa	Namibia	3	1	3	1	47.1389			1	all	3	3	Free rights to use for domestic purposes. Domestic includes personal stock watering.	Water Resources Management Act, No. 11 of 2013, s. 38-40	Water owned by State (Constitution, 1990, Art. 100). Persons have free right to take water for own domestic use without licence, as does an owner or occupier of land outsider a local authority area, subject to health and safety restrictions (s. 38, 39). An owner or occupier including on communal land also has right to collect rainwater on land for domestic but not to an extent that affects enviro…	2013	YES	NO	YES	YES	YES
NPL	Asia	Southern Asia	Nepal	2	1	1	1	28.7478			10	all	3	3	Under the Water Resources Act, 2049 (1992) citizens as individuals or collectives are granted use rights. State owns water. Management is implied in nature of permitted free use by communities.	Water Resources Act, 2049 (1992). Constitution 2015	Article 35 (4) of the Constitution states "Every citizen shall have the right of access to clean drinking water and sanitation." Sec. 3 of the Water Resources Act, 2049 provides that "the ownership of the water resources available in Nepal shall be vested in Nepal." Individuals are granted beneficial use rights. Article 4: "no license shall be required for ... (a) for one's own drinking and other…	1992	YES	NO	NO	YES	YES
NZL	Oceania	Australia and New Zealand	New Zealand	4	2	4	2	42.2164	6.29723	2.65846	3	IP	2	1	The Resource Management Act 1991 does not define water ownership but endows significant rights to owners that amount to ownership. Contested issue for Maori who claim proprietary rights and acquire important decision-making roles over areas titled to them.	Resources Management Act, 1991 as amended up to 2016. Marine and Coastal Area (Takutai Moana) Act 2011 (MCAA 2011)	Although water is unownable, rights to land defined as including water rights, and both effectively amount to ownership. Heavily regulated and constrained by conditions in the Resource Management Act, 1991. Water is hotly debated as an unownable public resource or as property by Maori IP. Maori have secured freehold collective title to 6% of NZ land area, mostly in remote and uninhabited areas in…	1991	YES	NO	YES	YES	YES
NIC	Americas	Central America	Nicaragua	3	1	2	1	42.0891			2	IP	1	1	Law 445 indicates that ownership rights to water are included within the bundle of communal property rights.	Water Law 2007; Article 5, 89-91, 107, 181 Constitution of Nicaragua, 1987; Statute of Autonomy of the Atlantic Coast (1987); Law 445 (Law of Communal Property Regime of the Indigenous Peoples and Ethnic Communities of the Autonomous Regions of the Atlantic Coast of Nicaragua and of the Rivers Bocay, Coco, Indio and Maiz);	Constitution 1987 at Articles 5 and 89 recognize that indigenous peoples and peoples of the Atlantic Coast have the right to preserve communal forms of land property and their exploitation, use and enjoyment in accordance with law, but only in relation to the communities of the Atlantic Coast at Article 89 is it specified that this includes their enjoyment, use and benefit of the waters and fores…	2007	NO	ND	NO	YES	YES
NGA	Africa	Western Africa	Nigeria	2	1	2	1	77.7364			1	all	2	3	While land & water vested in State customary rightholders may freely take & use water on their land for domestic purposes, stock watering & irrigation. No provision for collective tenure.	Water Resources Act, No. 101 of 1993, Section 2(a) (iii)	All land and resources are nationalized including water, and control vested in the federal or state governments, so communities obtain either free or licenced use rights (commercial). But provision for communal tenure does not exist outside of setting aside lands for grazing.	1993	YES	YES	NO	YES	YES
NOR	Europe	Northern Europe	Norway	4	2	4	2	2.70147	1.97036	0.0532287	1	all	3	2	With approval from the bygd commons board, fishing may take place within waterways in Bygd Commons. Communities, as citizens, can also use water for domestic purposes. The same legal protections that apply to land also apply to water. Sami can use watercourse for fishing and other domestic purposes.	Section 8-3, Act on Bygd Commons 1992; Act No. 3 of 1940 on watercourses. Sec. 2, Finnmark Act; Water Resources Act 2000	The Mountains Act 1992 provides fishing rights. The owner of the holding with rights of common appendant may only exercise the right to the extent necessary to cover needs of the holding for agriculture-related operations. Section 1-1 of the Act relating to bygd commons provides that "bygd commons is commons where property rights to the ground and remainder vest in at least half of the agricultur…	2000	ND	NO	NO	YES	YES
OMN	Asia	Western Asia	Oman		1	4	1	4.74572			1	all	4	4	Land and all groundwater is public property. No provision for community or IP lands or associated rights although customary systems known to exist.	Law on Water Resources, 1988	There is no explicit legal recognition of land rights held by indigenous peoples and local communities in Oman. Since 1988 Oman's law on water resources "Declares the groundwater reservoirs a public wealth to be exploited subject to water use regulations to be prepared by the Ministries of Environment and Water Resources and MAF, in a manner that will not affect the available water resources". Ho…	1988	YES	YES	NO	ND	ND
PAK	Asia	Southern Asia	Pakistan	3	1	2	1	47.0268	0.0656516	0.0308738	1	all	1	3	Constitution 1973 safeguards Islamic law and custom and usage, provides for Tribal Areas. Water is uncertainly unownable public or private. Private rights to water exist.	Water Accord 1991; Constitution of Pakistan, 1973; Canal and Drainage Act; Land Reforms Act 1977; Land Control Karachi Division Act 1952; Land Acquisition Act 1894; Transfer of Property Act, 1882, Registration Act, 108, Stamp Act 1899.	Constitution recognizes customary law if not repugnant to Sharia, provides for local government in states including Tribal Areas (Arts, 8,. 28, 36, 203B, 246, 247). Water is not explicitly mentioned as unownable or national property (although this is so for continental shelf: Art. 172). The 1991 Water Accord establishes how water must be allocated between the different provinces, but does not def…	1973	NO	NO	NO	YES	YES
PAN	Americas	Central America	Panama	4	1	3	1	30.3605	1.0988	0.333602	1	IP	1	2	In 2012, the Government enacted Act No. 11 of 26 March 2012 which allowed the Ngobe-Bugle comarca indigenous communities to manage minerals, water, and environmental resources. Unclear whether other communities have ownership or use rights to water located on their lands.	Constitution, 1972 Art 127. Act No. 11 of March 2012.	Many laws define rights in Panama but without a single water law. Some laws provide significant rights to communities. In general, resource rights are not clearly defined within Panama's legislative and regulatory framework, which is why Panama did not receive the highest score for this indicator. Relevant laws include: Art. 127, Constitution of Panama, 1972; Ley 72 de 2008; Act No. 2 of 16 Sep 1…	2012	ND	NO	ND	ND	YES
PNG	Oceania	Melanesia	Papua New Guinea	1	1	2	1	2.62774			0	all	1	2	Customary rights to use water are recognized by the Water Resources Act, 1982. However, community landowners are not given full ownership rights to water located on their land. Instead, the law provides only a right to use water for domestic purposes, fire fighting purposes, and recreational purposes.	Water Resources Act, 1982	The Water Resources Act, 1982 recognizes "customary rights to the use of water" which are defined as "rights to the use of water- (a) that are authorized by custom; and (b) that are being availed of at the time in question, or in the normal course of land managaement, would be availabed of in a customary manner within a reasonable period after that time." Section 5 of the Water Resources Act, 198…	1982	YES	NO	NO	YES	YES
PRY	Americas	South America	Paraguay	3	1	3	1	55.0843			1	IP	1	2	Article 3 of Ley No. 3.239/07 (Water Resources Law) provides that "the waters, surface and ground, are owned by the public domain and its domain is inalienable and imprescriptible. The Water Resources Law grants all citizens the right use and drink water to fulfil their daily needs and for household & domestic purposes (Arts. 13, 15, 16).	Ley N° 3.239/07 - De los recursos hídricos del Paraguay. ; Arts. 63-66, Constitution of Paraguay; Indigenous Communities Statute (Act. No 94/81); Act NO. 43/89 (Regularization of title to indigenous settlements); Law No. 919/96 amending and extending several articles of Law No. 904 dated December 18, 1981 "Statute of indigenous communities."	Water is a public resource, neither alienable or prescriptible (Water Resources Law, 2007). According to Article 15 of the 2007 Water Law, the "The surface and ground water resources use for domestic purposes and basic household production that are used directly by the user, without the intervention of any kind, are freely available, are not subject to permits or concessions or taxes of any kind.…	2007	YES	ND	NO	YES	YES
PER	Americas	South America	Peru	3	1	3	1	19.0083			3	all	1	2	Water resources belong to the Nation. However, customary rules are respected as well as their right to use water resources within their lands including commercial and sustenance purposes.	Water Resources Law 29338 (2009) Art III, Art 64, Art 107, Art 117, Art 118.	This right is granted in perpetuity and it has preeminence over other rights and uses (e.g. uses for hydro structures). There is special protection for non-contacted native communities, in which lands the national authority will not grant any authorization of water use for any third party.	2009	YES	NO	NO	YES	YES
PHL	Asia	South-Eastern Asia	Philippines	3	1	2	1	41.7212			6	IP	1	2	Definition of ancestral domain explicitly includes bodies of water, including inland waters and coastal waters within its boundaries. But the provision on natural resources exploitation and development within ancestral domains is ambiguous, merely granting priority rights to ICCs/IPs.	R.A. 8371, IPRA, Sec. 3(a), 5, 7(a) & 57	Note Constitutional provision declaring state ownership of all waters (Art. XII, Sec. 2). Similarly, under Presidential Decree No. 1067, the Water Code, 1976 all waters are state owned (Art. 3-6). This effectively limits the scope of ancestral domains. Art. 7 provides that "... any person who captures or collects water by means of cisterns, tanks, or pools, shall have exclusive control on such wa…	1976	YES	NO	NO	YES	YES
POL	Europe	Eastern Europe	Poland	4	2	4	1	47.108	0.527412	0.248453	1	all	4	3	Water is Poland is owned by the State, but citizens are granted rights to use water under the Water Law, 2001. Since community land rights are limited to forest areas, it can be implied that water rights are also limited to such areas.	Water Law, 2001; Constitution of Poland	No direct provision for community ownership of waters, as water is state property. No provisions for communities to secure title. However, ccording to a secondary source, forests in Poland are privately-owned, individually owned, commune-owned, state-owned, or national parks. Forests in Poland, 2013. Available at: http://www.lasy.gov.pl/publikacje/in-english/forests-in-poland-2013.	2001	YES	NO	NO	ND	ND
PRT	Europe	Southern Europe	Portugal	2	1	4	2	40.4083	12.9101	5.21673	6	all	2	1	Article 1 of the Law No. 54/2005 on the legal regime of water domain establishes that water in the public domain belongs to the state. However private property owners can obtain ownership rights to water located on their property. Since communities may own and manage wastelands, they also have rights to own water within these areas.	Water Act No. 58/2005; Law No. 54/2005 on the legal regime of water domain; Decree-Law No. 226-A/2007 on the use of water resources; Constitution of Portugal; Law No. 168/99 on Land Expropriation; Law No. 68/93 on Uncultivated Land (Law on Baldios)	(Law No. 54/2005 on the legal regime of water domain) permits private ownership of water rights on own properties. Law No. 68/93 (Law on Baldios) states that vacant land (wasteland) in Portugal is owned and managed by local communities (Art. 1). Communities must abide by use plans that are developed in cooperation with Portuguese administrative bodies (Art. 6). Article 2 of Law No. 68/93 (Law on …	2005	NO	NO	NO	YES	YES
COG	Africa	Middle Africa	Republic of Congo		1	2	1	31.1186			1	all	3	2	Constitution and Law 9-2004 establish water as State property but guarantee domestic access for individuals and collective groups.	Art. 9 Law No. 9-2004 stipulates that water and natural resources on soil and seabed, river and land are owned by the State.	Art. 9 of Loi No. 10-2004 fixant les principes generaux applicables aux regimes domanial et foncier, provides that in the case of collective property, registration may be in the name of the collective or any group it has established. Decret No. 2006-255 and 2006-256 provide details of procedure. Art. 9 Law No. 9-2004 On State Domain stipulates that water and natural resources on soil and seabed, …	2004	YES	YES	NO	YES	YES
ROU	Europe	Eastern Europe	Romania	3	1	3	2	60.1095	1.04845	0.630216	14	all	2	1	Although surface waters and major rivers owned as public domain 1996 Water Law Art 3, the Law also provides that land owners may own minor rivers. All citizens have a free right to use water for domestic purposes. Therefore, forest communities in Romania have a right to own minor rivers and use water for domestic purposes.	Water Law, 1996 (Law No. 107); Constitution of Romania, 1991; Law on Land Resources No. 81/1991; Law on Cadastre and Land Registry (Law 7/1996); Forest Code, 2008	Collectives own the ponds and streams on their lands, of less than 5 km long and with a hydrographic basin of less than 10 sq km. Over this size, they are owned by the state. The right to use the water is free for all. The community may not use the water for commercial purposes without authority from government (Law of Waters 107/1996) Article 3 provides that "(1) the Public domain shall own the …	1996	NO	NO	YES	YES	YES
RUS	Europe	Eastern Europe	Russia	4	1	3	1	13.2945			1	IP	3	3	The Water Code of Russia, 2008 provides state ownership of surface waters and public water bodies (art. 6). It further provides that "every person has the right of access to public water bodies and can use them free of charge for personal and domestic needs..." Indigenous Peoples have this right.	Water Code, 2008; Art. 8, On Guarantees of the Rights of Numerically Small Indigenous Peoples of the Russian Federation (Federal Law No.82-FS) ; Federal Law No. 104-FS ("On Obshchina"); Federal Law No. 49-FS ("On Territories'); Constitution; Land Code	Article 6 of the Water Code states "1. State- or municipality-owned surface water bodies are public water bodies, i.e. publicly accessible water bodies, except as otherwise provided in this Code. 2. Every person has the right of access to public water bodies and can use them free of charge for personal and domestic needs, except as otherwise provided in this Code and other federal laws." Under Ch…	2008	YES	ND	YES	YES	NO
RWA	Africa	Eastern Africa	Rwanda	1	1	1	1	73.3482			1	all	3	3	Water belongs to the State. Domestic water needs take priority. No provision for community land or water ownership or customary governance thereof other than to water associations.	Environmental Law 15/2005. Law 62/2008 Putting in Place the Use, Conservation, Protection & Management of Water Regulations.	All laws reiterate that waters belong to the State (e.g. Art. 3 & 12 of Law 62/2008, Art. 15 of Law 15/2005) and is inalienable, imprescriptible and cannot be seized. 'Only some temporary use rights can be granted in accordance with this law' (Art. 12 of Law 62/2008). Domestic use takes priority, livestock watering second priority. Land owners must use water for irrigation 'rationally' (Art. 48).…	2005	YES	NO	NO	ND	ND
SLE	Africa	Western Africa	Sierra Leone	2	1	1	1	54.7104			1	all	1	3	All water belongs to the State. Rights to use water descend from statute and customary law but without legal provision beyond arrangements for piped water in towns.	State Land Act No 19. of 1960, s.2 & 7. Sierra Leone Water Company Act No. 6 of 2001 s. 13-15.	Although applicable to a small part of the country (Western Province) the Crown Land Act turned into the State Land Act No. 19 of 1960 at independence guides land takings for public works and in the process describes public lands as "including all shores, beaches, lagoons creeks, river estuaries ..." (s.2). It also implies that water use for domestic purposes is not subject to licences, thus free…	1960	YES	NO	YES	YES	YES
SGP	Asia	South-Eastern Asia	Singapore	4	2	4	2	0.930889			0	IP	4	4	Water is a public asset to which Singaporeans have use rights, mainly under licence and strict pollution and other controls. The Orang Asli Laut depend on mangroves but have no legal rights protecting their use.	Environmental Protection and Management Act, No. 9 of 1999 as amended.	The Constitution and no other law defines ownership of water but reports treat this as a public unownable asset. Numerous regulations re piped water quality and controlling pollution, and distribution matters. The Seletar or Orang Asili Laut are the aboriginal coastal dwellers of the region, living along the mangroves of the Seletar River. This habitat is not protected, and is endangered and disa…	1999	YES	NO	NO	NO	NO
ZAF	Africa	Southern Africa	South Africa	4	2	3	1	79.83			2	all	2	3	The National Government is the public trustee of all water and responsible for its protection and wise use. Individuals & communities have rights to use domestically and acquire rights for other purposes.	National Water Act, No. 36 of 1998, sections 3 & 4.	The Interim Protection of Informal Land Rights No 31 of 1996 continues to protect rights to unregistered tribal, customary and, indigenous lands in rural areas and in informal settlements as property interests (enforceable against the owner, the state) until registered, but explicitly excludes tenants on registered properties. The Communal Land Rights Act, 2004 provided for registration but was s…	1998	YES	NO	NO	ND	YES
SSD	Africa	Eastern Africa	South Sudan	1	1	1	1	0			0	all	1	1	Land Act declares rivers, lakes, canals, haffirs, wetlands and other areas of water to be public land (owned collectively by nation) except for pools, streams, swamps or secondary rivers traditionally owned and managed by a community.	Land Act, 2009, s. 10 (f).	Water Policy, not accessible. No Water law enacted. Land Law is nevertheless clear on customary ownership of small waters and access rights to large waters (primary rivers, wetlands. Note that the Sudd constitutes 8,000 sq. km and can triple in size in wet season,a critical resource for pastoralists and agro-pastoral communities, who are guaranteed water access by Land Act, 2009, s. 66-6, s. 170 …	2009	NO	NO	YES	YES	YES
LKA	Asia	Southern Asia	Sri Lanka	3	1	2	1	43.6932			9	all	4	4	Although Sri Lanka established the Water Resources Board Act, 1964, there is no national-level statute or regulation establishing legal rights to water. In practice, Sri Lankans get their water supplied by the National Water Supply & Drainage Board, and communities obtain water through customary d practices, not protected by law.	Water Resources Board Act, 1964; Agrarian Development Act, No. 46, 2000; State Land Ordinance, 1947; Irrigation Ordinance, 1946; Land Settlement Act 1990; Protection of Tenants (Special Provisions) Act 1970; Pasture Lands (Reservation and Development Act (No. 4 of 1983); Land Reform Act 1972; Land Acquisition Act 1950; Land Development Ordinance 1935	Basic legal rights to water are not explicitly established in water-related legislation, and there is no explict mention of customary rights to water. For more info see: Asian Development Bank. 2009. Water Rights and Water Allocation: Issues and Challenges for Asia. Available at: http://www.sswm.info/sites/default/files/reference_attachments/BIRD%20et%20al%202009%20Water%20Rights%20and%20Water%20…	1964	ND	NO	NO	ND	ND
SDN	Africa	Northern Africa	Sudan	1	1	2	1	28.6979			2	all	4	3	All water is public property. Under Islamic Sharia, customary law & formal enactments, communities have rights of access including for irrigation & stock watering. Permits variously required.	Constitution, 2005, Civil Transactions Act, 1984, s. 59-601. Water Resources Act, 1995.	Public property in Sudan's law is deemed registered as property of Government. Constitution 2005 focused only on management (Art. 11) while 1998 Constitution states that water is public property (i.e. government property. Art. 9. Constitution 2005 respects terms of 1998 Constitution (2005, Art. 226). States run water corporations, regulate, allocate rights. The Water Resources Act 1995 concerns N…	1995	YES	YES	NO	YES	YES
SWZ	Africa	Southern Africa	Swaziland	2	1	2	1	71.0465			3	all	2	2	Water is owned by the nation. Access for domestic purposes is obligatory.	Water Act, No. 7 of 2003, s. 34.	No private rights of property in any natural water. Not necessary 'for any person or community to obtain a permit for the use of water for primary purposes' (Water Act, 2003, s. 34). Primary purposes defined as including water for domestic requirements, sanitation, watering of up to 30 head of cattle, irrigation up to 1/4 ha (s. 2). Customary tenure is acknowledged and chiefs regulate water use w…	2003	YES	NO	NO	YES	YES
SWE	Europe	Northern Europe	Sweden	4	2	4	2	7.44568	1.70281	0.126786	1	IP	3	3	Sami have traditional grazing and other rights including use of water and are included as co-managers as appropriate, such as within Laponian World Heritage Site. However, the law does not provide Sami with explicit rights to water located outside the World Heritage Site.	Government of Sweden. 2011. The Laponia Ordinance (Svensk forfattningssamling 2011:840); Management plan for Laponia Tjuottjudus. Available at: http://laponia.nu/wp-content/uploads/2014/08/Laponia-forvaltningsplan-eng-web-150327_2.pdf;Consitution of Sweden; Land Code (SFS 1970:994) 2006; Ordinance (1998:L896) on Land and Water Management	“Laponiatjuottjudus is the organization with the overall management responsibility for the Laponia World Heritage Site which is recognised for both its cultural and natural values (which includes for example four large national parks and four nature reserves). The organisation has been characterised as a co-management regime consisting of members from Sami reindeer herding communities (Swedish: s…	1998	NO	NO	NO	YES	YES
CHE	Europe	Western Europe	Switzerland	4	2	4	2	38.5338	2.24815	0.866296	2	all	4	1	Publicly-owned water bodies include surface waters (rivers, streams, lakes) (Article 664 of the Civil Code). The Civil Code also provides that landowners have ownership rights to the springs and groundwater located on their property (Art. 704, Civil Code). Therefore community landowners of forest areas and common pastures have ownership rights to the forests and common pastures. State-level (cant…	Civil Code (1912); Water Protection Law, 1991; The Ordinance on Water Protection, 1998; Constitution of Switzerland; Loi fédérale sur l'aménagement du territoire (Loi sur l'aménagement du territoire, LAT), 1979; ordinance on summer pasturing payments (Sömmerungsbeitragsverordnung, SöBV) in 1999; Loi fédérale sur les forêts (Loi sur les forêts, LFO); law on the communes (Gemeindegesetz, GG- canton…	State-level (cantonal) laws recognize community rights to "Group inherited” forests and common pastures (e.g. Canton Graubünden). However, since LandMark's assessment is limited to national level laws, state-level laws are not assessed and marked 4 because of this. There are no explicit provisions recognizing and protecting community land rights in federal laws .Article 704 of the Civil Code stat…	1912	NO	NO	YES	NO	YES
TJK	Asia	Central Asia	Tajikistan	3	1	2	1	34.1893			6	all	3	2	Water owned by the State. The Law on Pastures suggests that Pasture User Unions have rights to local water sources for maintaining livestock (Art. 27 of Law on Pastures).	Constitution of Tajikistan 1994; Law on Pastures, 2013	Constitution 1994 (as amended until 2003) Article 13." Land, its entrails, water, airspace, flora and fauna, and other natural resources shall be owned by the state, and the state guarantee their effective use in the interests of the people". Pastures are state property in Tajikistan. However, local communities can obtain rights to use pastures under short-term leases if the community obtains a c…	2013	YES	YES	NO	ND	YES
TZA	Africa	Eastern Africa	Tanzania	1	1	1	1	44.7618			1	all	1	2	Like land, water belongs to the nation, vested in the President as trustee. Customary water rights are upheld as of equal status and effect as for water rights under a statutory land title. Commercial uses need permits.	Water Resources Management Act, 2009, s. 10 -12, 52.	As with land, water is owned by the national community in common, vested in the President as its trustee. Lawful occupants of lands may collect water, dig wells, collect rainwater etc. for domestic uses without permits. Customary land rights are explicitly recognized and declared to be 'in every respect of equal status and effect to a granted water right' (s. 52). This is circumscribed by need to…	2009	YES	YES	NO	YES	YES
THA	Asia	South-Eastern Asia	Thailand	3	1	3	1	43.2774			13	all	3	3	The Constitution of Thailand 2007 grants all citizens the rights to use natural resources (Art. 25). Therefore, communities, as citizens have water access rights. Since communities are only granted Community Land Use Permits to state forest land, communal water rights are also limited to use rights to those areas.	Art. 25, Constitution of Thailand 2007. Art. 1339 of the Civil and Commercial Code	Article 1139 of the Civil and Commercial Code provides that "the owner of a piece of land is bound to take the water that flows naturally on to it from higher land. Water that flows naturally on to lower land and is necessary to such land may be retained by the owner of the higher land only to such extent as is indispensable to his land." Communities are not granted land ownership rights in Thail…	2007	YES	NO	NO	ND	ND
TUR	Asia	Western Asia	Turkey	3	2	3	1	50.1033	13.524	6.77598	7	all	3	3	Communities, as citizens of Turkey, are granted rights to drink and use water for domestic purposes. Use rights to pastures and rangeland are granted to municipalities and villages. Thus, it is concluded that communities have rights to use water located on pastures and rangelands.	Law No. 831 on water (1926); Law No. 7478 on potable water for villages (1960);. Law on pastures No. 4342. (1998);	Law No. 7478 1960 on potable water provides for drinking water for villages. NOTE: Reviewer had difficulty translating Law No. 831 on water. Article 4 of the Law on Pastures 1998 provides that rights to use rangeland, pastures and winter pastures are granted to villages and municipalities" with implication that access to water within those areas is available to communities, under village and muni…	1998	YES	NO	NO	ND	YES
TKM	Asia	Central Asia	Turkmenistan	3	1	3	1	72.0065			5	all	4	4	Article 3 of Water Code provides that all water bodies are property of the State. Article 4 indicates that ownership of water is exclusively held by the State. Individuals are granted rights to use water for drinking and household needs (Arts. 16-17, and 21). No provision for communities to communally manage local waters.	Code of Turkmenistan "On Water", 2004; Constitution of Turkmenistan; Land Code, 2004; Law "On state registration of rights to immovable property and transactions related thereto" 2014; Law on Peasant Associations 1995	Article 16 of the Water Code, 2004 provides that "water users in Turkmenistan can be legal and physical persons of Turkmenistan". Article 21 of the Water Code provides that priority must be given to water bodies used for drinking and household needs. Article 1 of the Land Code, 2004 provides that land is the property of the Turkmen people, under the protection of the state. Article 16 of the Land…	2004	YES	NO	NO	YES	YES
UGA	Africa	Eastern Africa	Uganda	3	1	1	1	71.8881	0.0733958	0.0527628	1	all	1	2	Water is vested in Government in trust for the people, who have a general right of use for domestic, fire fighting and garden irrigation. Customary tenure fully recognized so customary regulation implied.	Water Statute, 1995, s. 4, 7.	Customary land rights are recognized in Uganda to equal degree of freehold, leasehold, and mailo (tenancy) tenure. However, water on customary/community lands remains owned by the state, as is the case for all water. There is no special provision for communities to own and regulate water but given the legal status of customary tenure, community-based regulation by communities may be safely implie…	1995	YES	NO	NO	YES	YES
UKR	Europe	Eastern Europe	Ukraine	4	1	2	1	71.2458	0.751115	0.535138	4	all	2	1	Villages have equitable ownership and use rights with legal entities & private citizens. Article 59 of the Land Code recognizes that water rights may be granted to communities, clarified by Art 6 of Ukraine's Water Code as use rights.	Water Code (No.213/95-VR of 1995); Constitution of Ukraine; Forest Code (No.3852-XII of 1994); Land Code (No. 2768-III of 2001); Civil Code; Law No. 1457-IV regarding demarcation of public and municipal land, 2004	Ukraine's Constitution 1996 Art 13 makes "land, subsoil, atmosphere, water and other natural resources the object of the right of property of the Ukrainian peple. Ownership rights on behalf of the Ukrainian people are exercised by bodies of state power and local self government". Municipalities and villages are units of local self-government, have considerable authority under state laws. Article …	1995	YES	NO	NO	NO	YES
USA	Americas	Northern America	United States	4	2	4	2	44.6251	5.52719	2.46652	1	IP	2	3	The Supreme Court held that water rights are defined by Congress, but when American Indian reservations are established by treaty, statute or executive order, implied reservation of water rights is included.	Winters v. United States, 207 U.S. 564 (1908); Arizona v. California, 531 U.S. 1 (2000)	Most native Americans do not have absolute land title: federal statutes establish native reserves, which is technically government owned land used for Indian use. Native Americans can also establish aboriginal title or obtain reserves through executive orders, but are generally granted only use and occupancy rights to their land. Compensation for expropriation is only payable when aboriginal titl…	1908	NO	NO	NO	YES	YES
URY	Americas	South America	Uruguay	4	1	4	1	82.5597	1.40548	1.16036	2	all	4	4	The state owns all water in the public domain (Art. 16 Water Code 1978). All citizens may gain rights to use public water if they register (Art. 8). Private property owners have rights to rainwater & riverbeds located on their property. No provision for communities as owners.	Ley Nº 14.859 - Código de Aguas (1978). Constitution. Laws No. 18638 (2009), 18.461 (2009), 18,308 (2008), 18,187 (2007), 18,092 (2007) 17930, 15,239 (1981), 13,968 (1971), 13,667 (1968), and 10,051 (1941).	Dominant tenure is private and public no provision for community lands or IP lands. Produces an effective distinctin between private water, largely attached to registered properties, and public water, to which citizens may have registered rights. Laws: Nº 14.859 - Código de Aguas (1978); Constitution; No. 18638 (2009), No. 18461 (2009), No. 18092 (2007) on farm ownership and incorporation. Also l…	1978	YES	NO	YES	ND	NO
VEN	Americas	South America	Venezuela	4	2	3	1	24.4884			2	IP	1	3	The law includes water as part of the "indigenous habitat," but Art. 54 mentions natural resources owned by the State located in indigenous communities	2005 Ley Orgánica de Pueblos y Comunidades Indígenas, Arts. 3(5), 53-54	IP communities are granted land rights, although unclear in law is this is dependent upon case by case registration. Despite ratifying ILO 169 the national law is unclear if IP have ownership of water in their lands. Contradictory legal provisions, hence score of 3.	2005	ND	NO	ND	YES	YES
VNM	Asia	South-Eastern Asia	Vietnam	3	1	2	1	35.0685			1	all	2	2	Land & water belongs to state but State may issue rights including to communities" to preserve identity and customs". Under Article 1 of the 1998 Water Resources Act, communities, as citizens of Vietnam, are also granted rights to use water "for life and production"	Law on Water Resources 1998; Law on Land 2013; Constituon of Vietnam	The Constitution vests all land, forests, rivers, lakes, water resources in the population, but the state is empowered to manage and allocate land use rights to communities. Article 5 includes "communities" as a category of land users and defines communities as "Communities, including Vietnamese communities residing in the same village, street quarter or similar residential area sharing the same …	1998	YES	YES	NO	YES	YES
YEM	Asia	Western Asia	Yemen		1	2	1	44.5972			2	all	4	4	All citizens of Yemen have a right to use water for drinking and household needs (Section IV, Water Law of 2002).	Yemen Const. art. 8, Yemen Water Law of 2002 (No. 33, 2002).	Yemeni water law does not acknowledge communal ownership and management of water resources or provide for a collective right to water. The law is inconsistent, placing the state and land owners on equal footing to claim rights over the same water resource. Article 8 of Yemen's constitution states that all natural resources, above or below ground, belong first and foremost to the state. This inclu…	2002	YES	NO	NO	ND	YES
ZMB	Africa	Eastern Africa	Zambia	1	1	2	1	32.0639			1	all	2	2	Water vested in President, no ownership possible, but domestic use prioritized and does not require permit. Customary practices to apply.	Water Resources Management Act, No. 21 of 2011, s. 3, 4, 6.	Sec. 4 of No. 21 of 2011 "… a person shall not own any water in its natural state in Zambia and no property in such water shall be acquired". Sec. 5 "The Authority shall ensure that traditional practices as recognized in customary areas and which are beneficial to water resource management are taken into account ...". Sec. 6. Principles include that "... water is a basic human need and as such do…	2011	YES	YES	NO	YES	YES
ZWE	Africa	Eastern Africa	Zimbabwe	2	1	1	1	41.8767			1	all	3	3	All water vested in President and rights to water in Communal Lands are vested in Minister in charge of Communal Lands. Rights for domestic use assured.	Water Act, No. 31 of 1998, No. 14 of 2002, s. 2-4.	Community ownership is not available in Zimbabwe retaining majority population as tenants of State on Communal Lands. This also limits water rights, controlled by the Minister. Local chiefs in communal areas regulate water in accordance with directives from the national government or district councils. Provision for communal lands as lands set aside for customary tenure, and community jurisdictio…	1998	YES	NO	NO	ND	YES
